# Supplementary material for: RNA marker modifications reveal the necessity for rigorous preparation protocols to avoid artifacts in epitranscriptomic analysis
Source: PubMed Central journal article supplement (PMC9071408; doi:10.1093/nar/gkab1150), 2021-12-01
Supplement: gkab1150_supplemental_file.pdf [file gkab1150_supplemental_file.pdf]

Supplemental Material to

## RNA marker modifications reveal the necessity for rigorous preparation protocols to avoid artifacts in epitranscriptomic analysis

Florian Richter<sup>1,†</sup>, Johanna E. Plehn<sup>1,†</sup>, Larissa Bessler<sup>1</sup>, Jasmin Hertler<sup>1</sup>, Marko Jörg<sup>1</sup>, Cansu Cirzi<sup>2,3</sup>, Francesca Tuorto<sup>4,5</sup>, Kristina Friedland<sup>1,\*</sup>, and Mark Helm<sup>1,\*</sup>

|           |                                                                                                                                              |
|-----------|----------------------------------------------------------------------------------------------------------------------------------------------|
| Page s2-3 | Abbreviation list                                                                                                                            |
| Page s4   | Supplementary Figure S1. Capillary electrophoresis of polyA RNA                                                                              |
| Page s5   | Supplementary Figure S2. Preparative isolation of <i>in vitro</i> degraded RNA.                                                              |
| Page s6   | Supplementary figure S3. Enrichment of mitochondria tracked by modification profiles                                                         |
| Page s7   | Supplementary figure S4. Relative abundance of specific RNA modifications over time in tRNA & RF fractions during the RNA morgue experiment. |
| Page s8   | Supplementary figure S5. Comparison of different mouse brain tissues (cohort 2).                                                             |

## ABBREVIATIONS

|                      |                                                |
|----------------------|------------------------------------------------|
| RNA                  | Ribonucleic acid                               |
| tRNA                 | Transfer RNA                                   |
| rRNA                 | Ribosomal RNA                                  |
| mRNA                 | Messenger RNA                                  |
| RF                   | RNA Fragments                                  |
| PAGE                 | Polyacrylamide gel electrophoresis             |
| UV/VIS               | Ultraviolet/ Visible spectroscopy              |
| RIN <sup>e</sup>     | Electronical RNA integrity number              |
| h                    | hours                                          |
| d                    | days                                           |
| RT                   | Room Temperature                               |
| L                    | liter                                          |
| ml                   | Milliliter                                     |
| μl                   | Microliter                                     |
| μg                   | Microgram                                      |
| PCA                  | Principal component analysis                   |
| SILIS                | Stable isotope labelled internal standard      |
| SED                  | Standard Error of Difference                   |
| TBE                  | Tris-Borat-EDTA buffer                         |
| mA                   | Miliampere                                     |
| V                    | Volt                                           |
| M                    | Molar concentration                            |
| FastAP <sup>TM</sup> | Fast alkaline phosphatase                      |
| U                    | (enzymatic) units                              |
| HPLC                 | High pressure liquid chromatography            |
| MS                   | Mass spectrometry                              |
| ACN                  | Acetonitrile                                   |
| MWD                  | Multiple wavelength detector                   |
| AUC                  | Area under the curve                           |
| MPI                  | Max Planck Institute                           |
| PBS                  | Phosphate-buffered saline                      |
| MIB                  | Mitochondrial isolation Buffer                 |
| TOMM20               | Translocase of outer mitochondrial membrane 20 |
| PMSF                 | Phenylmethylsulfonylfluoride                   |
| TBST                 | Tris-buffered saline with Tween <sup>®</sup>   |
| polyA                | Polyadenylation                                |
| CE                   | Capillary electrophoresis                      |
| BSA                  | Bovine Serum Albumin                           |
| n.s.                 | Not significant                                |
| p-value              | Probability value                              |

RNA Modifications:

|                                  |                                      |
|----------------------------------|--------------------------------------|
| Am                               | 2'-O-methyladenosine                 |
| Cm                               | 2'-O-methylcytidine                  |
| D                                | Dihydrouridine                       |
| Gm                               | 2'-O-methylguanosine                 |
| I                                | Inosine                              |
| i <sup>6</sup> A                 | N6-isopentenyladenosine              |
| m <sup>1</sup> A                 | 1-methyladenosine                    |
| m <sup>2</sup> A                 | 2-methyladenosine                    |
| m <sup>6</sup> A                 | N6-methyladenosine                   |
| m <sup>6,6</sup> A               | N6,N6-dimethyladenosine              |
| m <sup>3</sup> C                 | 3-methylcytidine                     |
| m <sup>5</sup> C                 | 5-methylcytidine                     |
| mcm <sup>5</sup> U               | 5-methoxycarbonylmethyluridine       |
| m <sup>1</sup> G                 | 1-methylguanosine                    |
| m <sup>2</sup> G                 | N2-methylguanosine                   |
| m <sup>2,2</sup> G               | N2,N2-dimethylguanosine              |
| m <sup>7</sup> G                 | 7-methylguanosine                    |
| ms <sup>2</sup> i <sup>6</sup> A | 2-methylthio-N6-isopentenyladenosine |
| m <sup>3</sup> U                 | 3-methyluridine                      |
| m <sup>5</sup> U                 | 5-methyluridine                      |
| s <sup>2</sup> C                 | 2-thiocytidine                       |
| s <sup>2</sup> U                 | 2-thiouridine                        |
| t <sup>6</sup> A                 | N6-threonylcarbamoyladenosine        |
| Tm                               | 2'-O-methylthymidine                 |
| Um                               | 2'-O-methyluridine                   |
| Q                                | Queuosine                            |
| Ψ                                | Pseudouridine                        |

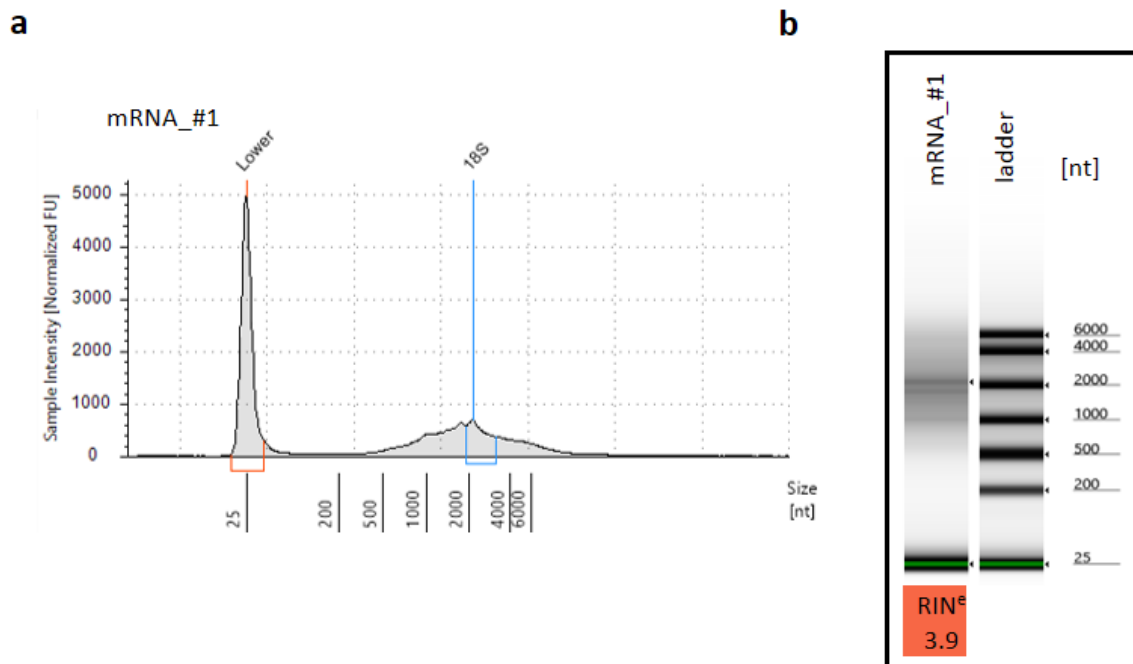

**Supplementary Figure S1. Capillary electrophoresis of polyA RNA.** The RNA was isolated according to Werner *et al.*, using double hybridization to oligo-dT. The resulting RNA still contains peaks in the typical size range of rRNA. (a) Size distribution of mRNA#1 using capillary electrophoresis. (b) CE profile of mRNA#1 compared to the standard ladder.

Werner, S., Galliot, A., Pichot, F., Kemmer, T., Marchand, V., Sednev, M.V., Lence, T., Roignant, J.-Y., König, J., Höbartner, C., Motorin, Y., Hildebrandt, A., **Helm, M.**, NOseq: amplicon sequencing evaluation method for RNA m6A sites after chemical deamination, (2021), *Nucleic Acids Res.*, Feb. 26, 49(4):e23,

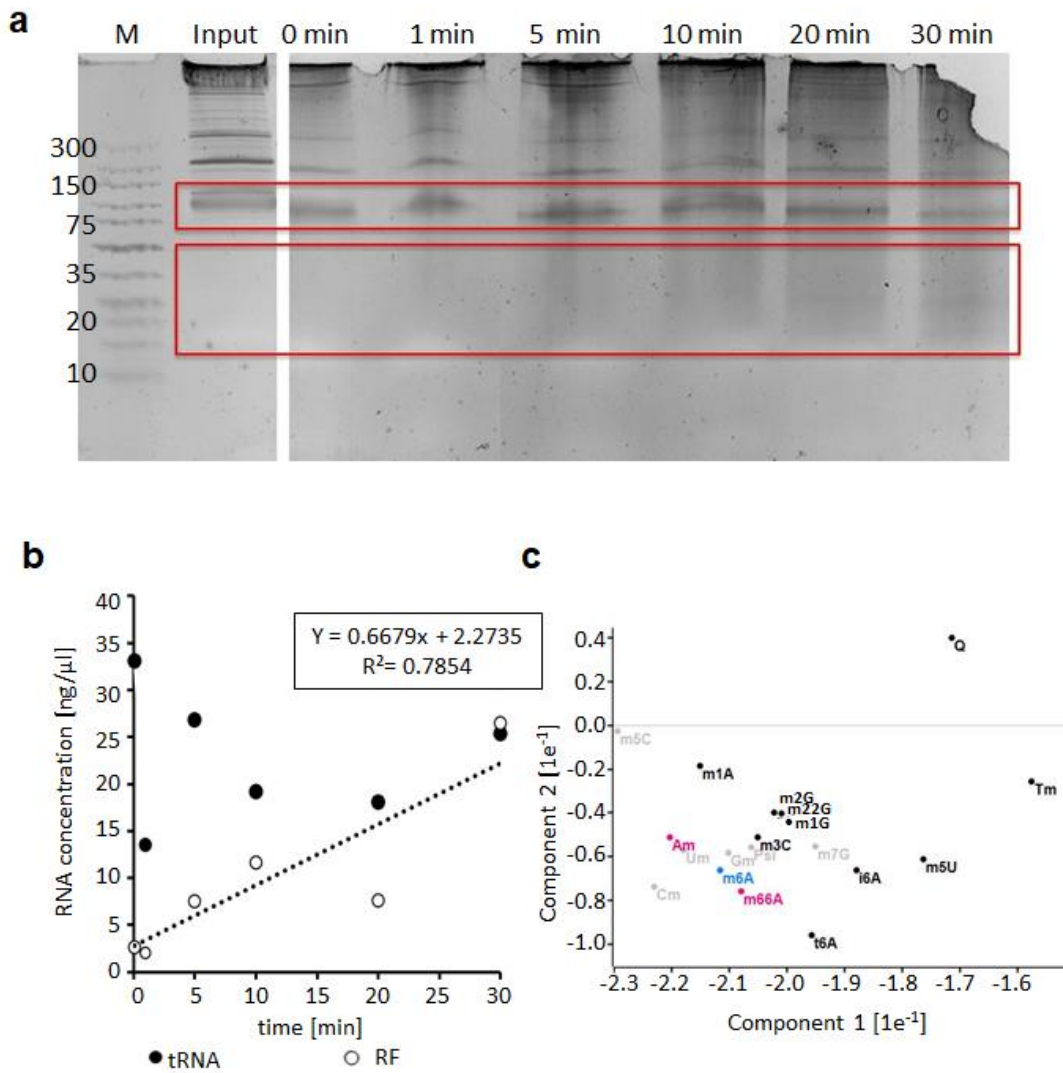

**Supplementary Figure S2. Preparative isolation of *in vitro* degraded RNA.** Aliquots of the degradation mix were quenched as described in the methods section, and the precipitated RNA was submitted to a 10% PAGE, from which tRNA and RF fractions were excised (red boxes in panel a) and eluted. The yields indicated in (b) relate to a total volume of 100  $\mu\text{L}$ . Panel (c) shows a zoom into the PCA of RF modifications from figure 2F.

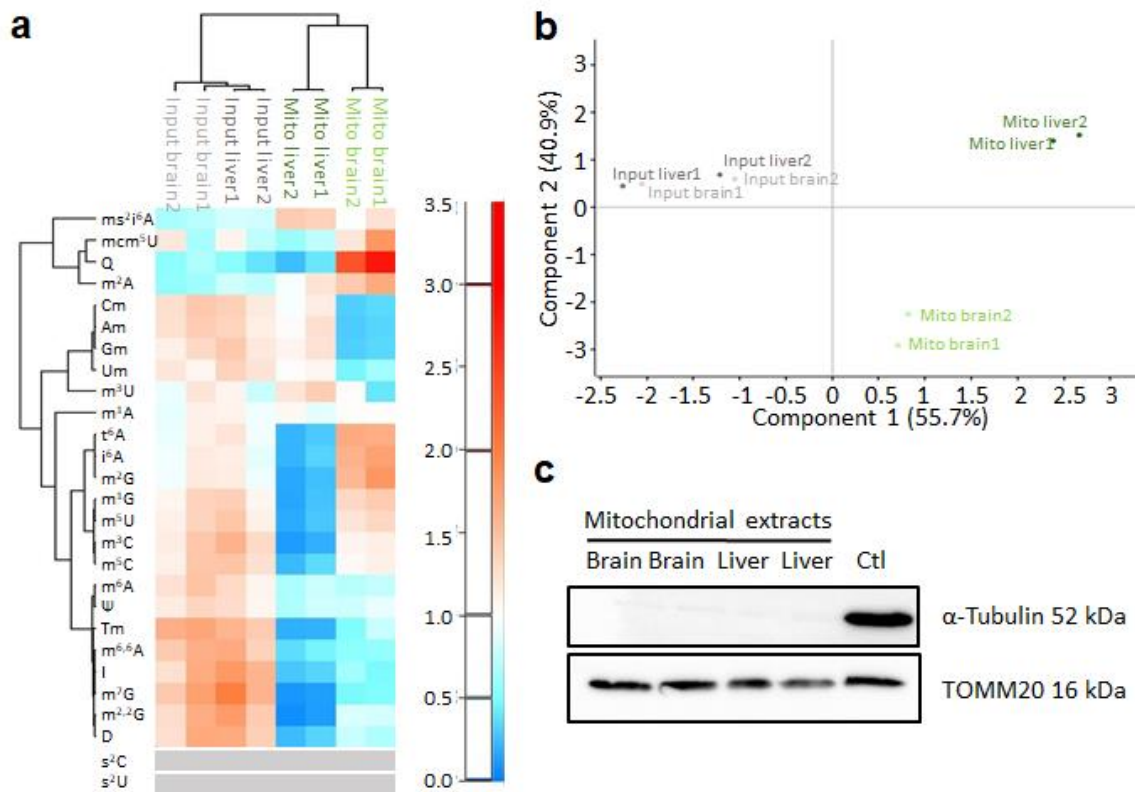

**Supplementary Figure S3. Enrichment of mitochondria tracked by modification profiles.** (a) Heatmap of modification content of input (total RNA from liver and brain) *versus* RNA of isolated mitochondria from liver and brain tissue. Input brain: light grey, input liver: dark grey, mitochondrial extracts from brain tissue: light green, mitochondrial extracts from liver: dark green. n=2 biological replicates, n=2 technical replicates. (b) Principle component analysis of the samples shown in (a) with identical color code. (c) Western Blot analysis of mitochondrial extracts versus whole mouse brain protein extracts (Ctl). α-Tubulin is not present in the mitochondrial extracts as it is a cytosolic protein and thereby confirms the purity the mitochondrial preparation. The mitochondrial marker TOMM20 is visible in the mitochondrial extracts as it is found in the mitochondrial outer membrane.

 No -80°C freezing of tissue before RNA extraction  with -80°C freezing of tissue before RNA extraction

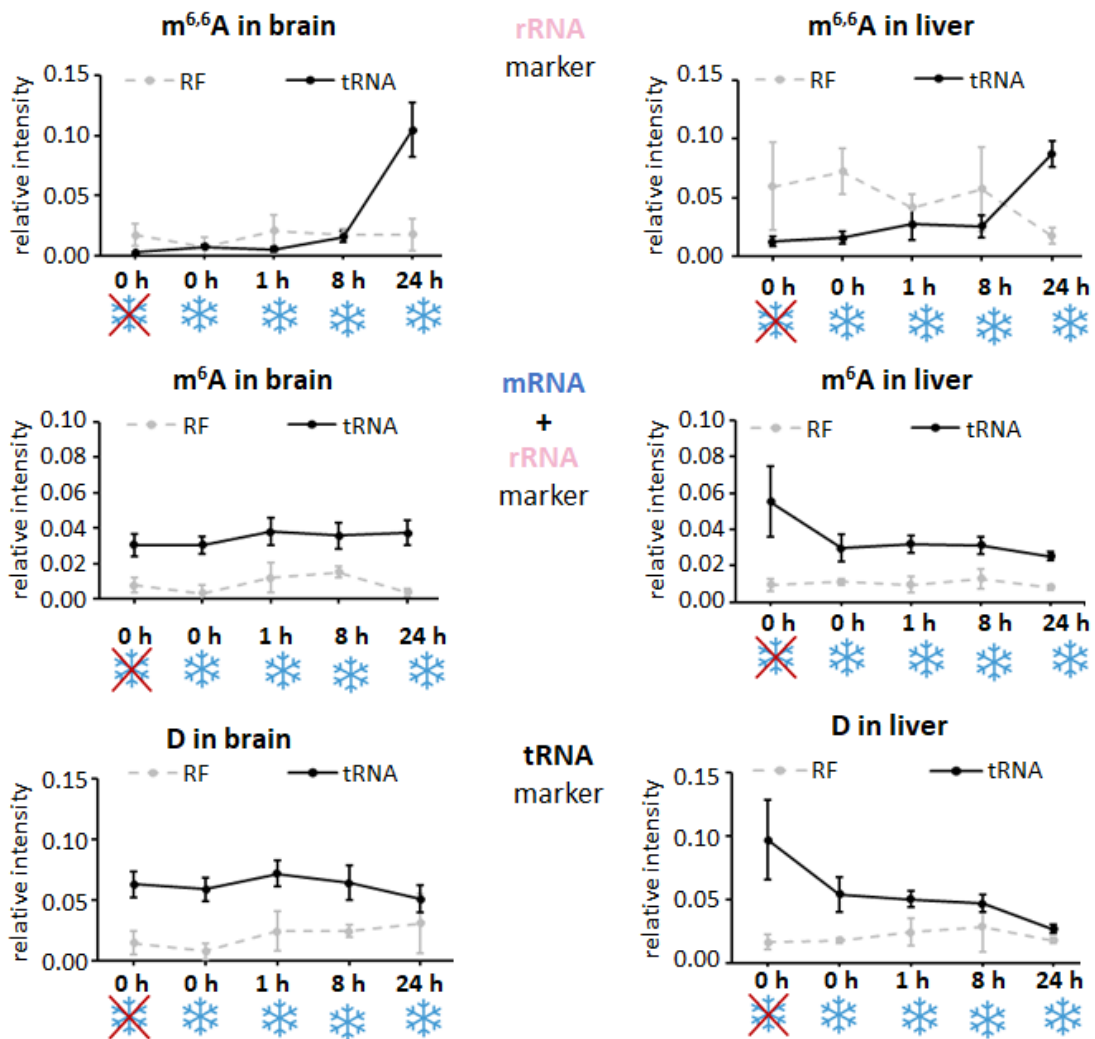

Supplementary Figure S4. Relative abundance of selected RNA modifications over time in tRNA & RF fractions during morgue experiment.

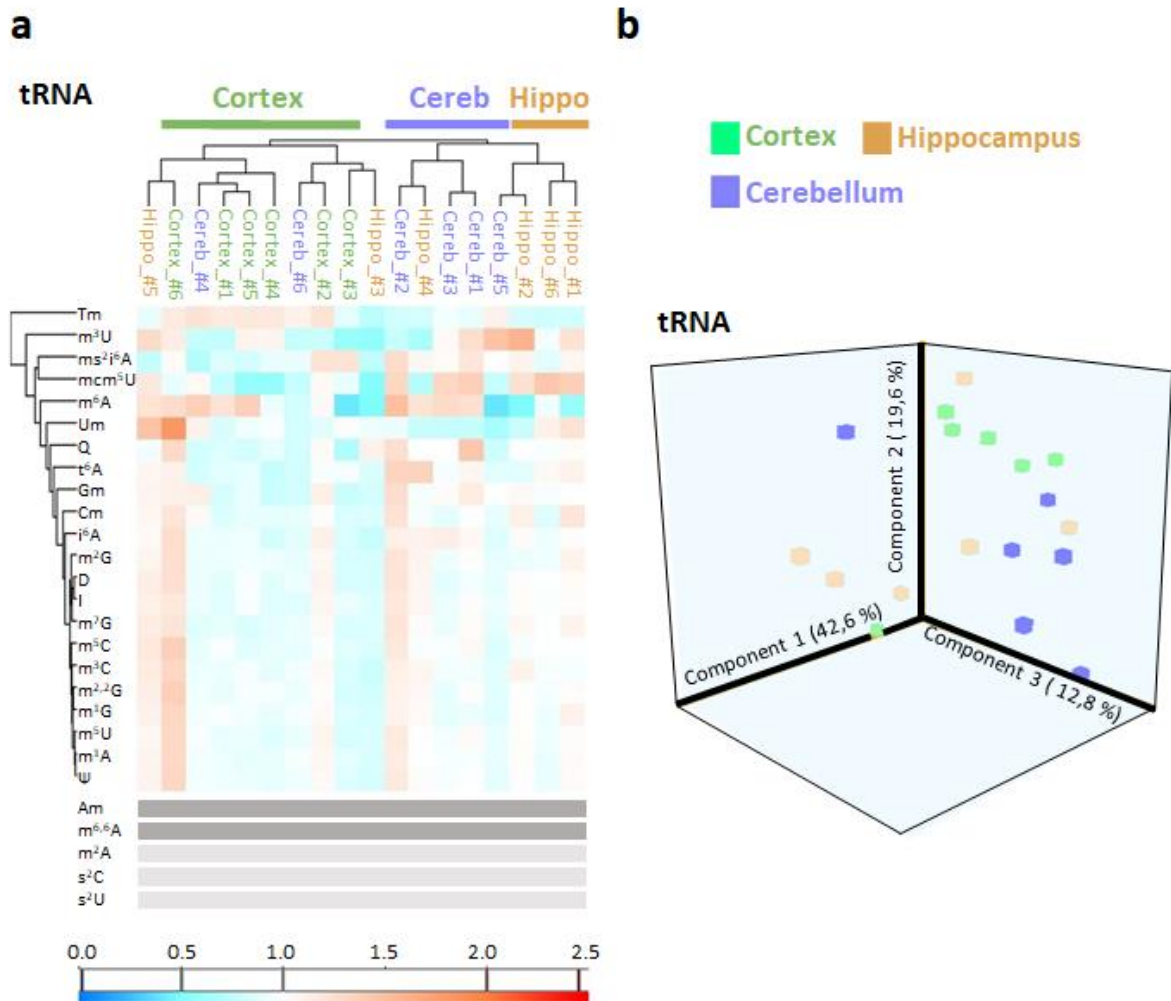

**Supplementary Figure S5. Comparison of different mouse brain tissues (cohort 2).** (a) Heatmap displaying tRNA and RF modification content of different brain areas from mice.  $n=4$  biological replicates. (b) Principal component analysis of brain area samples from (a). rRNA modifications in dark grey were omitted from the analysis. Modifications with signals below  $5\times$  S/N across all samples are represented by light grey bars.
